# Supplementary material for: Multi-Locus Phylogenetic Analysis Revealed the Association of Six Colletotrichum Species with Anthracnose Disease of Coffee (Coffea arabica L.) in Saudi Arabia
Source: MDPI journal article supplement (doi:10.3390/jof9070705), 2023-06-27
Supplement: s1 [file s1]

**Table S1.** Source, origin and date of collection of the 27 isolates obtained in this study

| Isolate Number | Identity                   | Collection date | Isolation source | Host                  | Location              |
|----------------|----------------------------|-----------------|------------------|-----------------------|-----------------------|
| PPDU26A        | <i>C. siamense</i>         | 13/10/2022      | leaves           | <i>Coffea arabica</i> | Jazan, Saudi Arabia   |
| PPDU26B        | <i>C. coffeae-arabicae</i> | 13/10/2022      | leaves           | <i>Coffea arabica</i> | Jazan, Saudi Arabia   |
| PPDU27B        | <i>C. siamense</i>         | 13/10/2022      | branch           | <i>Coffea arabica</i> | Jazan, Saudi Arabia   |
| PPDU27D        | <i>C. coffeae-arabicae</i> | 13/10/2022      | branch           | <i>Coffea arabica</i> | Jazan, Saudi Arabia   |
| PPDU27M        | <i>C. siamense</i>         | 13/10/2022      | fruit            | <i>Coffea arabica</i> | Jazan, Saudi Arabia   |
| PPDU28A        | <i>C. aeschynomenes</i>    | 13/10/2022      | fruit            | <i>Coffea arabica</i> | Jazan, Saudi Arabia   |
| PPDU28C        | <i>C. saudianum</i>        | 13/10/2022      | twig             | <i>Coffea arabica</i> | Jazan, Saudi Arabia   |
| PPDU28E        | <i>C. saudianum</i>        | 13/10/2022      | fruit            | <i>Coffea arabica</i> | Jazan, Saudi Arabia   |
| PPDU28L        | <i>C. saudianum</i>        | 13/10/2022      | twig             | <i>Coffea arabica</i> | Jazan, Saudi Arabia   |
| PPDU28J        | <i>C. saudianum</i>        | 14/10/2022      | leaves           | <i>Coffea arabica</i> | Jazan, Saudi Arabia   |
| PPDU29A        | <i>C. saudianum</i>        | 14/10/2022      | leaves           | <i>Coffea arabica</i> | Jazan, Saudi Arabia   |
| PPDU29B        | <i>C. saudianum</i>        | 14/10/2022      | leaves           | <i>Coffea arabica</i> | Jazan, Saudi Arabia   |
| PPDU29H        | <i>C. siamense</i>         | 14/10/2022      | leaves           | <i>Coffea arabica</i> | Jazan, Saudi Arabia   |
| PPDU29F        | <i>C. coffeae-arabicae</i> | 12/9/2022       | leaves           | <i>Coffea arabica</i> | Jazan, Saudi Arabia   |
| PPDU31I        | <i>C. saudianum</i>        | 12/9/2022       | leaves           | <i>Coffea arabica</i> | Al Baha, Saudi Arabia |
| PPDU31M        | <i>C. saudianum</i>        | 12/9/2022       | leaves           | <i>Coffea arabica</i> | Al Baha, Saudi Arabia |
| PPDU32A        | <i>C. coffeae-arabicae</i> | 12/9/2022       | leaves           | <i>Coffea arabica</i> | Al Baha, Saudi Arabia |
| PPDU32B        | <i>C. siamense</i>         | 12/9/2022       | leaves           | <i>Coffea arabica</i> | Al Baha, Saudi Arabia |
| PPDU36S        | <i>C. phyllanthi</i>       | 15/11/2022      | leaves           | <i>Coffea arabica</i> | Asir, Saudi Arabia    |
| PPDU38I        | <i>C. saudianum</i>        | 15/11/2022      | leaves           | <i>Coffea arabica</i> | Asir, Saudi Arabia    |
| PPDU38B        | <i>C. saudianum</i>        | 15/11/2022      | leaves           | <i>Coffea arabica</i> | Asir, Saudi Arabia    |
| PPDU38H        | <i>C. saudianum</i>        | 15/11/2022      | leaves           | <i>Coffea arabica</i> | Asir, Saudi Arabia    |
| PPDU38F        | <i>C. saudianum</i>        | 15/11/2022      | leaves           | <i>Coffea arabica</i> | Asir, Saudi Arabia    |
| PPDU39E        | <i>C. siamense</i>         | 15/11/2022      | branch           | <i>Coffea arabica</i> | Asir, Saudi Arabia    |
| PPDU39D        | <i>C. siamense</i>         | 15/11/2022      | branch           | <i>Coffea arabica</i> | Asir, Saudi Arabia    |
| PPDU40G        | <i>C. siamense</i>         | 13/12/2022      | leaves           | <i>Coffea arabica</i> | Asir, Saudi Arabia    |
| PPDU41K        | <i>C. karstii</i>          | 13/12/2022      | leaves           | <i>Coffea arabica</i> | Asir, Saudi Arabia    |
